# Supplementary material for: Small emission sources in aggregate disproportionately account for a large majority of total methane emissions from the US oil and gas sector
Source: Copernicus journal article supplement (doi:10.5194/acp-25-1513-2025), 2025-02-04
Supplement: Supplementary file 1 [file acp-25-1513-2025-supplement.pdf]

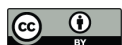

*Supplement of*

## **Small emission sources in aggregate disproportionately account for a large majority of total methane emissions from the US oil and gas sector**

**James P. Williams et al.**

*Correspondence to:* James P. Williams ([jamwilliams@edf.org](mailto:jamwilliams@edf.org)) and Ritesh Gautam ([rgautam@edf.org](mailto:rgautam@edf.org))

The copyright of individual parts of the supplement might differ from the article licence.

## **Table of contents:**

### **Supplementary figures:**

**Page S3 – Figure S1:** Total oil/gas methane emissions by basin and facility category

**Page S4 – Figure S2:** Spatial boundaries of remote sensing studies used for comparisons

**Page S5 – Figure S3:** Comparison to continuous emission distributions from Xia et al. (2024) and Kunkle et al. (2023)

**Page S6 – Figure S4:** Annual gas production by oil/gas basin

**Page S7 – Figure S5:** Annual combined oil and gas production by oil/gas basin

**Page S8 – Figure S6:** Facility-level emission distributions for remaining eleven oil/gas basins

**Page S9 – Figure S7:** Ranked cumulative percentage of methane emissions from production well sites versus cumulative oil and gas production

**Page S10 – Figure S8:** Sensitivity analysis on the limit of detection for empirical measurements

**Page S11 – Figure S9:** Sensitivity analysis on excluding empirical measurement data from oil/gas basins

**Page S12 – Figure S10:** Map of CONUS with oil/gas basins

**Page S13 – Figure S11:** Cumulative percentage of methane emissions by emission rate and percentage of cumulative facilities

### **Supplementary tables:**

**Page S14 – Table S1:** Breakdown of cumulative methane emissions by emission rate magnitudes

**Page S15 – Table S2:** Description of methods used to gather ground-based empirical measurements used in this work.

**Page S16 – Table S3:** Description of the locations where ground-based empirical measurements used in this work were gathered.

**Page S17-S18 – Table S4:** Comparison of total oil/gas methane emissions from our facility-level inventory to the target regions from other aerial-based remote sensing studies

**Page S19-S20 – Table S5:** Description of remote sensing campaigns used for comparison to the facility-level model.

**Page S21 – Table S6:** Goodness-of-fit tests for empirical measurement data versus output facility-level emission rates

**Page S22 – Table S7:** Comparison of reported methane emissions between Sherwin et al. (2024) and Cusworth et al. (2022)

## Supplementary Figures

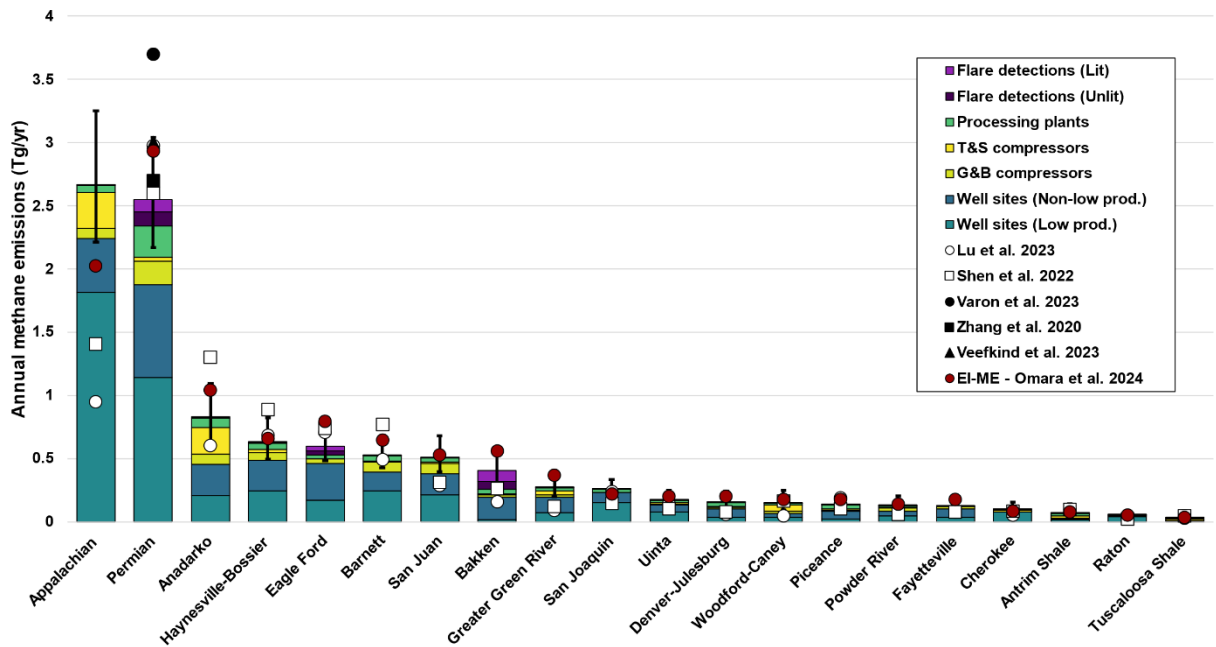

**Figure S1:** Total methane emissions for different oil/gas basin boundaries from our facility-level model results colored according to the emitting facility category with uncertainty bars (i.e., 95% c.i.) Other satellite-based studies are included for basin-level comparisons, except for the EI-ME (Omara et al., 2024) which estimates basin-level emissions using a measurement-based facility-level approach.

■ MethaneAIR  
■ Kunkel et al. (2023)  
■ Cusworth et al. (2022)
 ■ Chen et al. (2022)  
■ Alvarez et al. (2018)  
■ Xia et al. (2024)

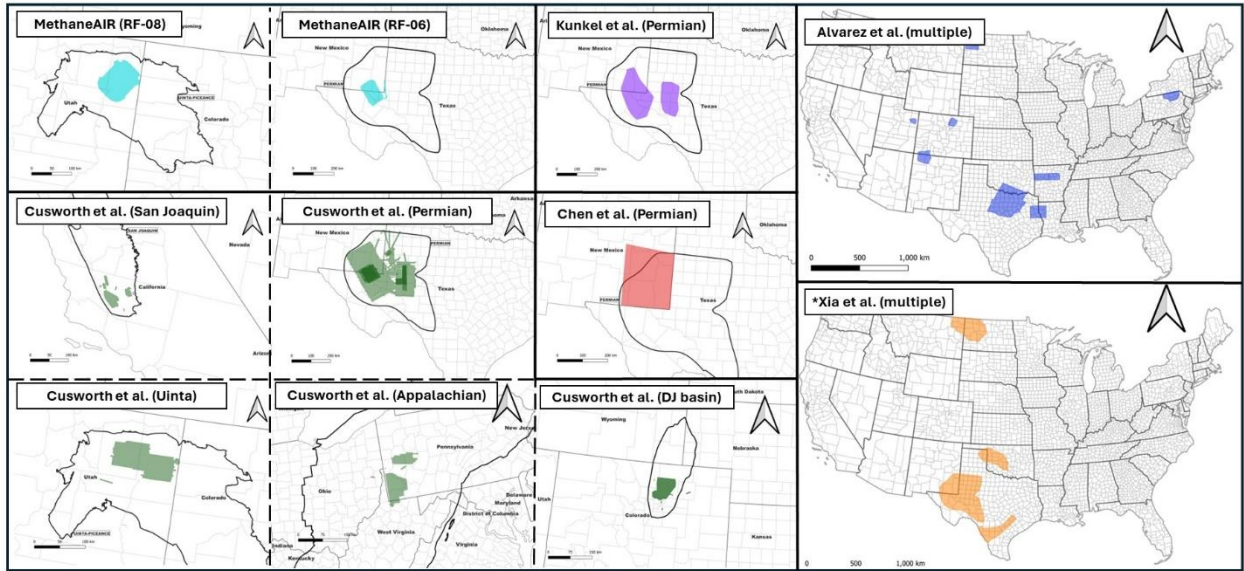

**Figure S2:** Spatial boundaries of remote sensing studies used for comparisons in Table S2, Fig. 7, and Fig. 8.

\*Spatial boundaries outlined by Xia et al. (2024) represent the measured oil/gas basins in their work, but not specifically the outlines of the flow boundaries within those oil/gas boundaries.

### Comparisons to Bridger Gas Mapping LIDAR remote sensing campaigns

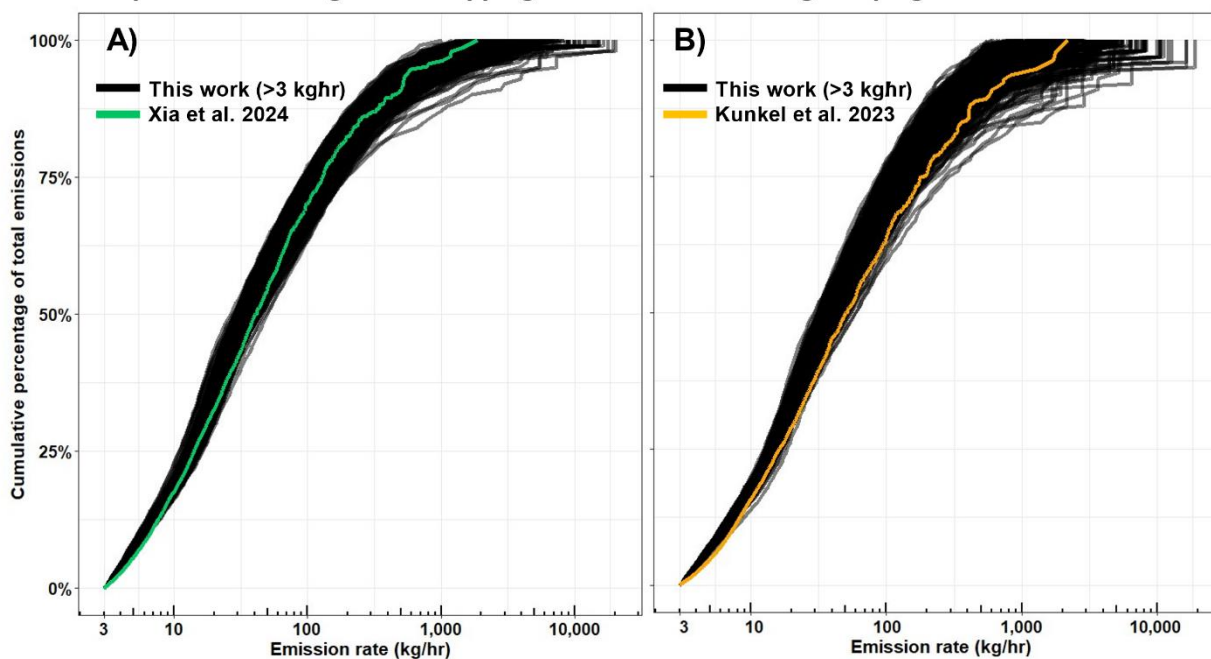

**Figure S3:** A) Comparison of our facility-level ensemble of methane emission distributions ( $n=500$ ) to the measured emissions from A) Xia et al. (2024) and B) Kunkel et al. (2023) for sources emitting above 3 kg/hr which is the approximate Bridger GML limit of detection. Spatial domains used for the comparisons of emission distribution curves are identical in Kunkel et al. (2023), and for Xia et al. (2024) we estimate emissions within the entire four-basin aggregate identified in their study since the actual aerial surveyed regions in their study are kept anonymous. Maps of all spatial boundaries used for comparisons are provided in Fig. S2.

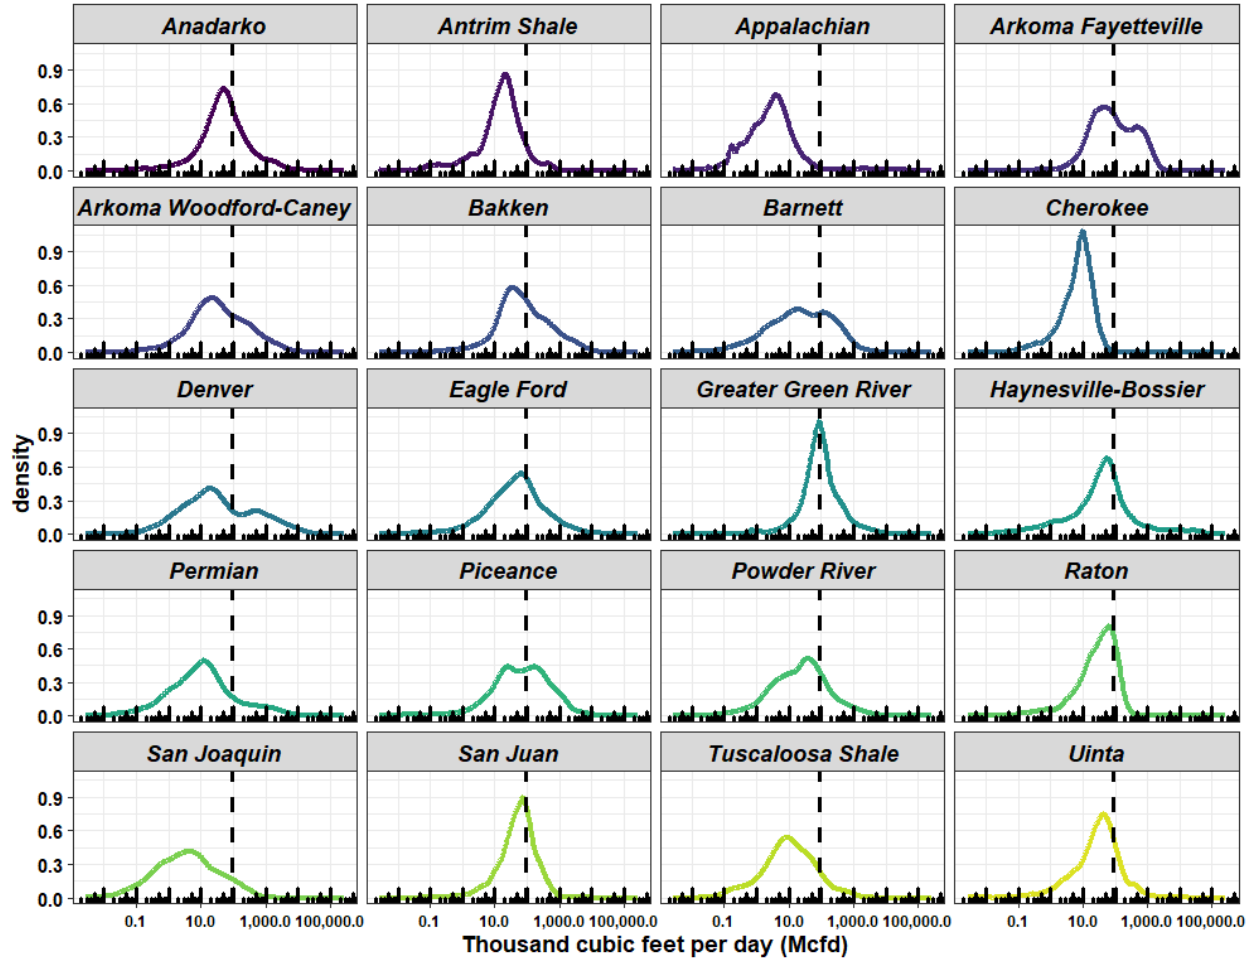

**Figure S4:** Kernel densities of well site level gas production (Mcf/day) for US oil/gas producing basins to illustrate differences in production characteristics among basins. For reference, the black segmented lines represent a gas production value of 90 Mcf/day, which corresponds to 15 boe/day. Unit conversions: 1 Mcf = 1,000 cubic feet of natural gas = 19.2 kg of methane at 15.6 °C and 1 atmosphere; 1 boe = 1 barrel of oil equivalent = 6 Mcf; assumed methane content in natural gas of 80%.

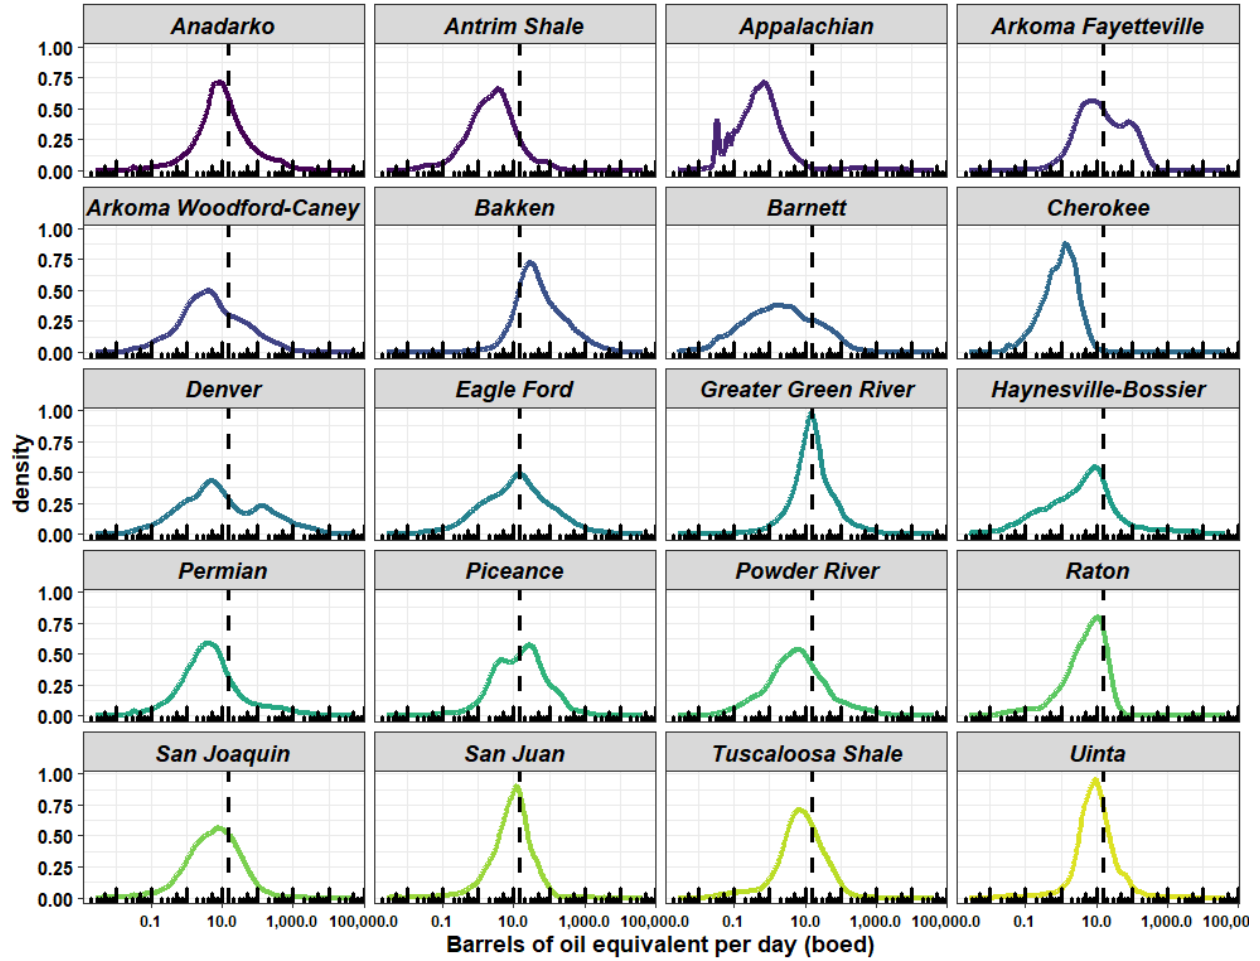

**Figure S5:** Kernel densities of well site level combined oil and gas production (boe/day) for US oil/gas producing basins to illustrate differences in production characteristics among basins. For reference, the black segmented lines represent a gas production value of 15 boe/day. Unit conversions: 1 Mcf = 1,000 cubic feet of natural gas = 19.2 kg of methane at 15.6 °C and 1 atmosphere; 1 boe = 1 barrel of oil equivalent = 6 Mcf; assumed methane content in natural gas of 80%.



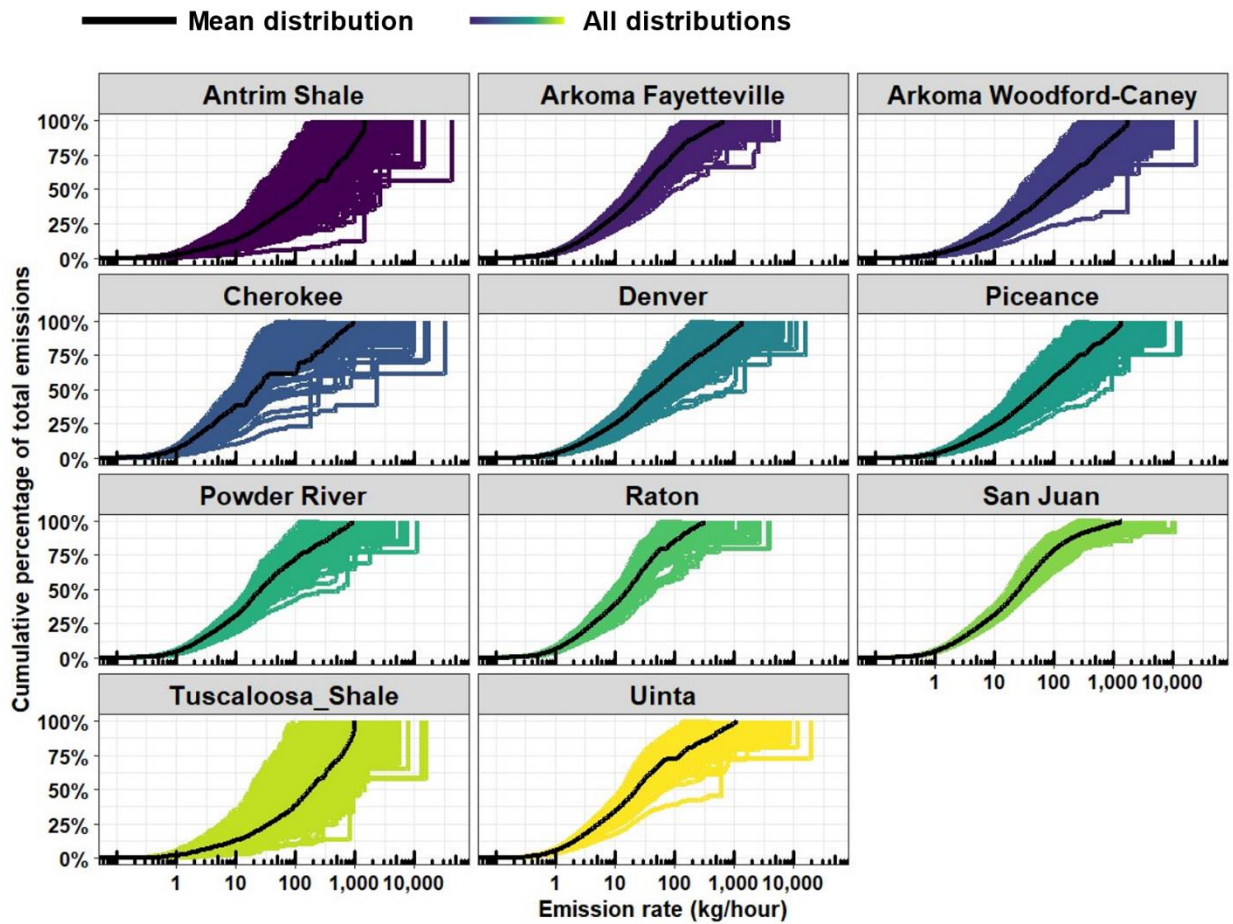

**Figure S6:** Results from 500 model simulations showing the cumulative methane emissions distribution curves for total upstream/midstream oil/gas methane emissions for the bottom eleven emitting oil/gas basins in the CONUS for 2021. The model averages for each basin are shown in the solid black lines. A map of the spatial boundaries used for the different oil/gas basins is shown in Fig. S10.

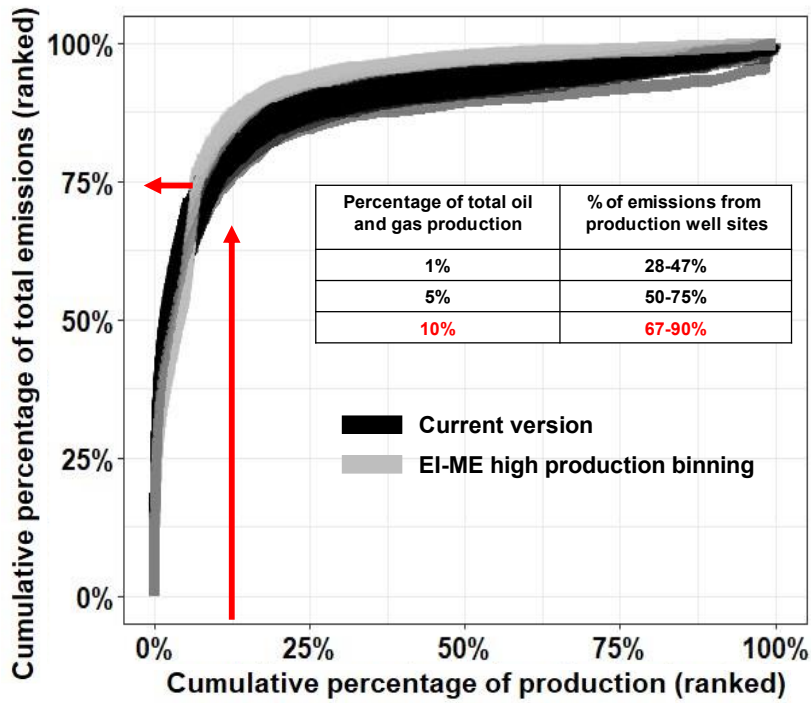

**Figure S7:** Results from 500 model simulations showing the cumulative methane emissions distribution curves for total well site oil/gas methane emission rates versus the percentage of cumulative combined oil and gas production using the well site production binning we present in this work (see Fig. 1), and the well site production binning used in Omara et al. (2024) for the EI-ME. The production bins used in this work are created based on equally distributing empirical measurement data for production well sites above an LOD of 0.1 kg/hr, and the EI-ME production bins are based on equally spaced  $\log(e)$  jumps from  $\log(5)$  to  $\log(10)$ . Results are ranked first by individual well-site emission rates, and then by well-site combined oil and gas production. The inset table shows the specific percentages of total emissions contributed from production well sites for cumulative well site production values of 1%, 5%, 10%, and 20%. The red arrows correspond to the percentage of total well site emissions contributed from well sites cumulatively producing 10% of total CONUS oil and gas production in 2021.

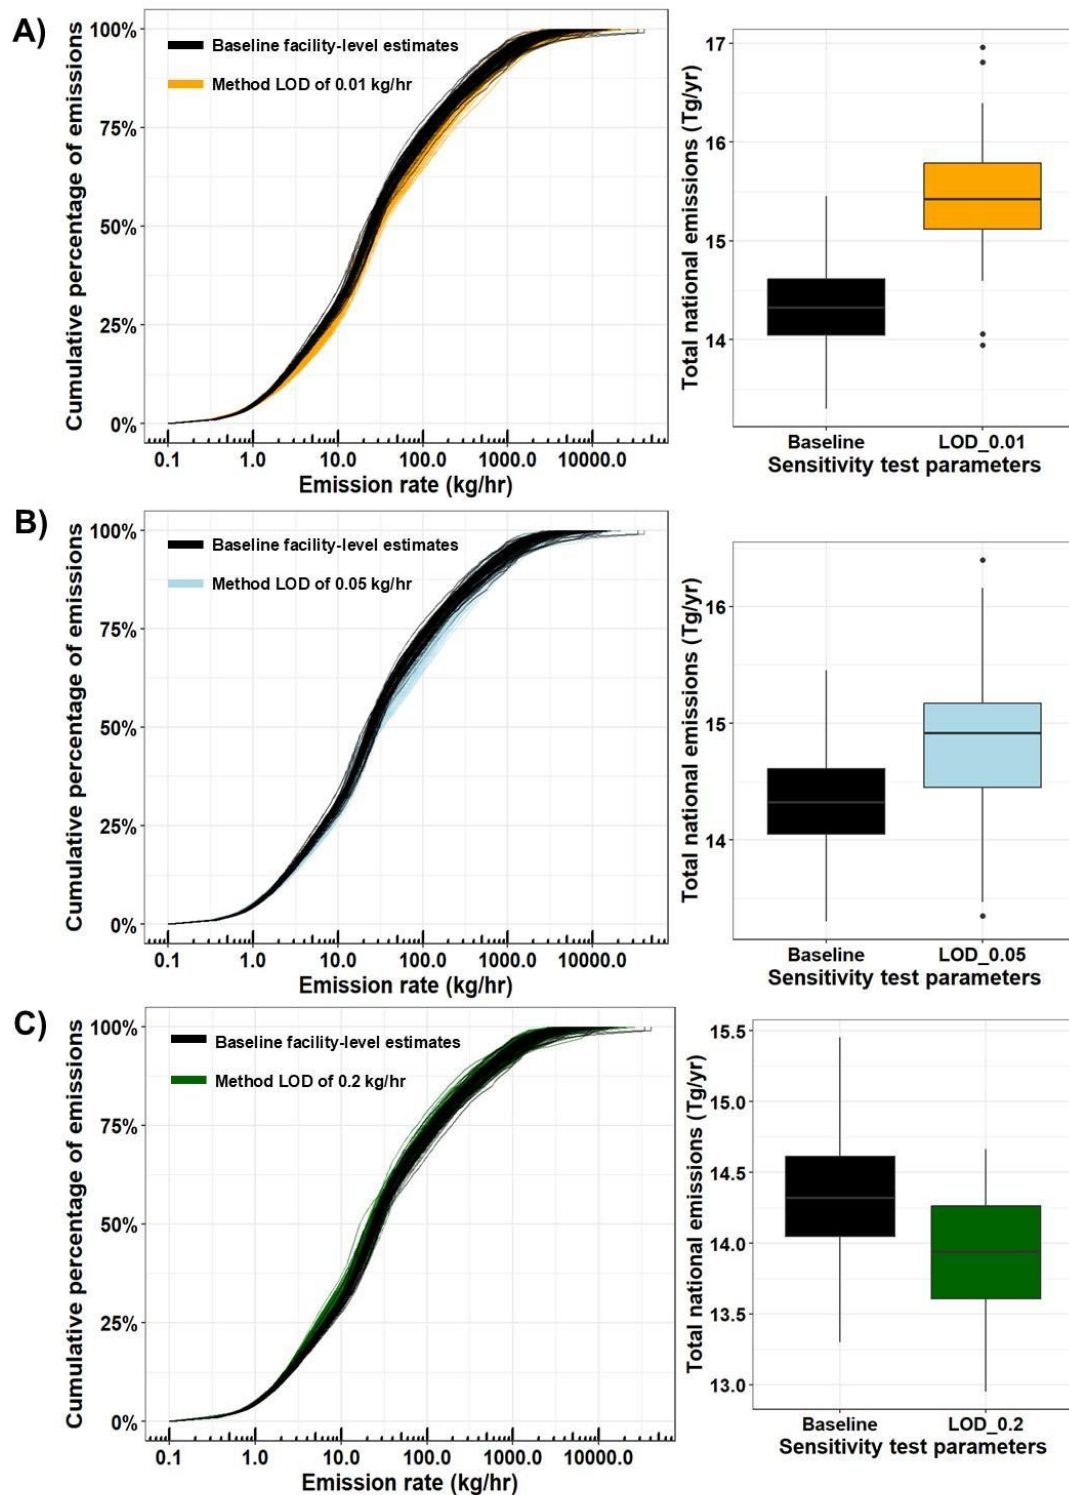

Figure S8: Results of a sensitivity analysis showing the impacts of modifying the method limit of detection used in the facility-level estimates for both the national-level oil/gas methane emission distributions (left) and total national methane emissions (right). Method LODs of A) 0.01 kg/hr, B) 0.05 kg/hr, and C) 0.2 kg/hr, were tested against the baseline LOD of 0.1 kg/hr.

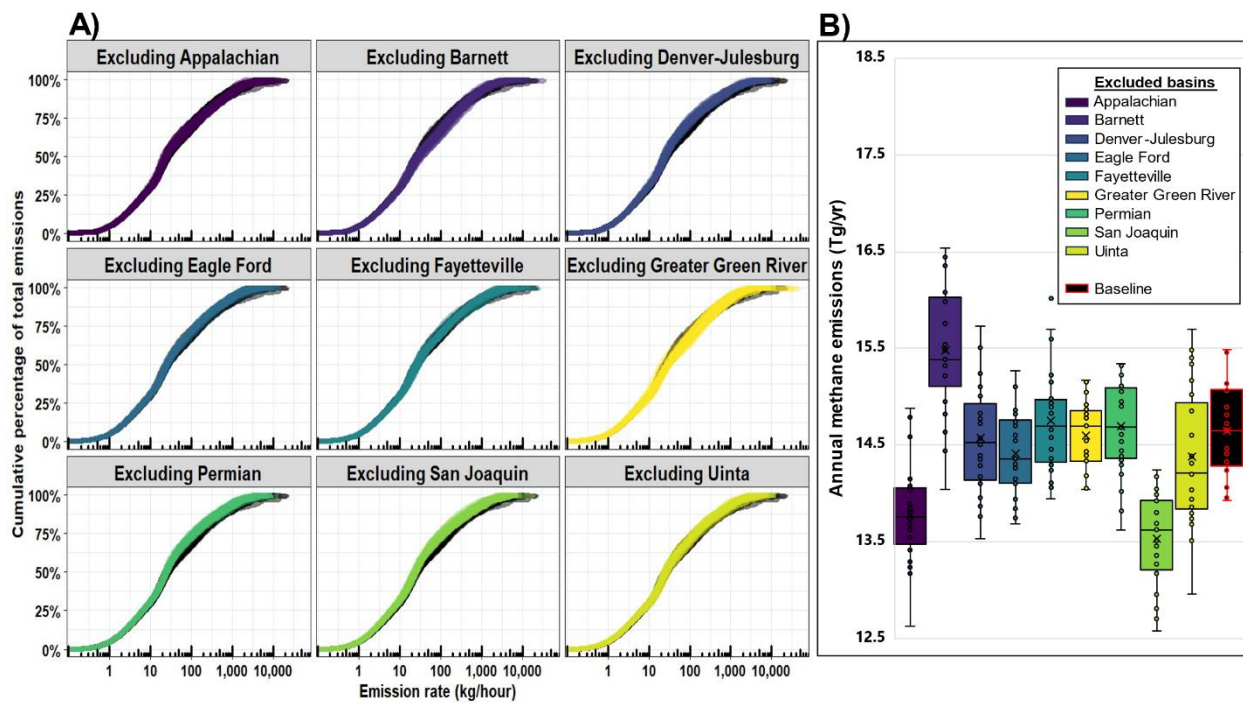

**Figure S9:** A) Sensitivity analysis of the effects of excluding empirical measurements from a single basin that shows the resulting impacts on oil/gas methane emission distributions for the CONUS. 25 emission distribution curves are presented for each basin (colored lines) exclusion scenario with comparisons to the entire dataset of empirical data (black lines). B) Sensitivity analysis of the effects of excluding empirical measurements from a single basin showing the impacts on total oil/gas methane emission estimates for the CONUS. Each box and whisker plot contains 25 estimates of total methane emissions colored according to the oil and gas basin from which empirical measurements were excluded. The black boxplot with red outlines shows the baseline scenario, which has no empirical measurement data removed.

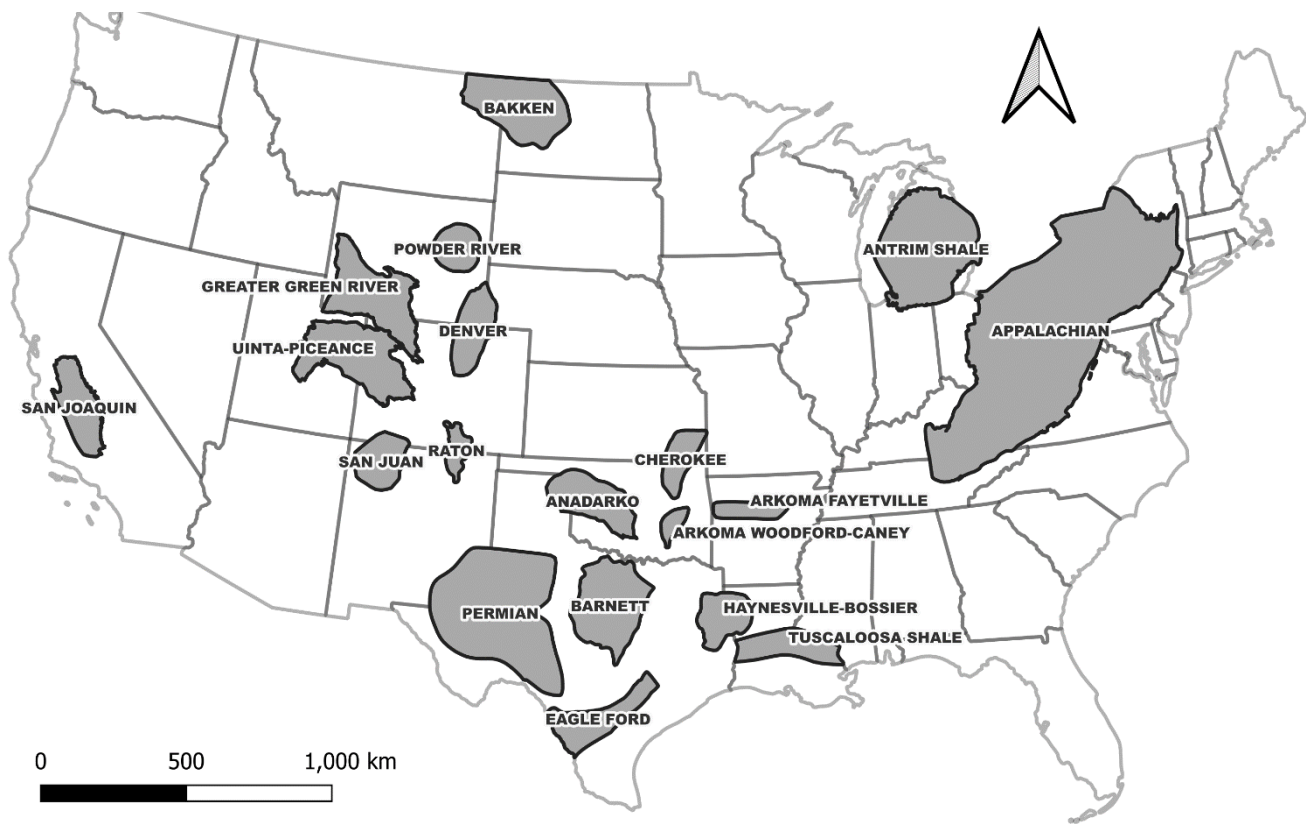

**Figure S10:** Map of contiguous United States (Alaska not shown) with oil/gas producing basins outlined in grey.

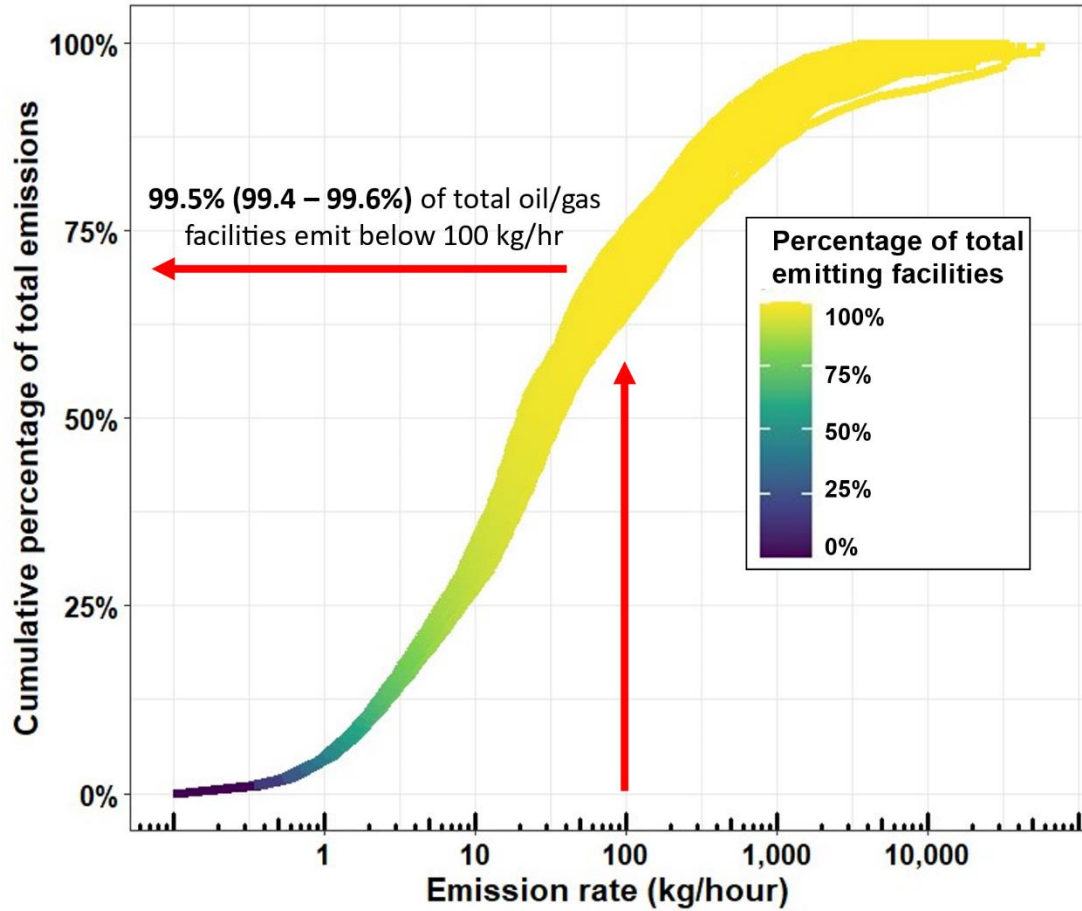

**Figure S11:** Results from 500 estimated facility-level emission distributions showing the cumulative percentages of total methane emissions contributed from facilities emitting below methane emission rate thresholds and colored according to the percentage of total emitting sites ranked by emission rate. The red arrows correspond to the cumulative emissions from facilities emitting <100 kg/hr, with the corresponding percentage of total facilities shown in the inset text.

## Supplementary Tables

**Table S1:** Breakdown of total oil/gas methane emission for the CONUS in 2021 contributed from different magnitudes of methane emission rates with the corresponding percentage of total facilities responsible for those emissions. These results show a breakdown of the emission distributions curves presented in Figure 3 of the main text.

| <b>Emission rate threshold range (kg/hr)</b> | <b>Percentage of total emissions</b> |
|----------------------------------------------|--------------------------------------|
| <b>≤0.1</b>                                  | <b>0.2% (0.1 - 0.3%)</b>             |
| <b>0.1 – 1</b>                               | <b>4.4% (4.1 – 4.8%)</b>             |
| <b>1 – 10</b>                                | <b>25% (24- 27%)</b>                 |
| <b>10 – 100</b>                              | <b>41% (39 – 42%)</b>                |
| <b>100 – 1,000</b>                           | <b>22% (21 – 23%)</b>                |
| <b>&gt;1,000</b>                             | <b>7.2% (5.0 – 8.6%)</b>             |

**Table S2:** Description of methods used to gather ground-based empirical measurements used in this work.

| Study                                   | Measurement method | # of measurements | Facility category |
|-----------------------------------------|--------------------|-------------------|-------------------|
| <a href="#">Brantley et al. 2014</a>    | OTM33a             | 228               | Well sites        |
| <a href="#">Caulton et al. 2019</a>     | Gaussian           | 564               | Well sites        |
| <a href="#">Deighton et al. 2020</a>    | HiFlow             | 43                | Well sites        |
| <a href="#">Omara et al. 2016</a>       | Tracer release     | 35                | Well sites        |
| <a href="#">Omara et al. 2018</a>       | Gaussian           | 52                | Well sites        |
|                                         | OTM33a             | 9                 | Well sites        |
|                                         | Tracer release     | 34                | Well sites        |
| <a href="#">Rella et al. 2015</a>       | Gaussian           | 185               | Well sites        |
| <a href="#">Riddick et al. 2019</a>     | Chamber            | 49                | Well sites        |
| <a href="#">Robertson et al. 2017</a>   | OTM33a             | 149               | Well sites        |
| <a href="#">Robertson et al. 2020</a>   | OTM33a             | 84                | Well sites        |
| <a href="#">Zhou et al. 2021</a>        | Gaussian           | 66                | Well sites        |
| <a href="#">Lan et al. 2015</a>         | Gaussian           | 32                | Well sites        |
| <a href="#">Goetz et al. 2015</a>       | Tracer release     | 3                 | Well sites        |
| <a href="#">Mitchell et al. 2015</a>    | Tracer release     | 115               | G&B compressors   |
| <a href="#">Robertson et al. 2020</a>   | OTM33a             | 3                 | G&B compressors   |
| <a href="#">Zimmerle et al. 2020</a>    | HiFlow             | 180               | G&B compressors   |
| <a href="#">Subramanian et al. 2015</a> | Tracer release     | 45                | T&S compressors   |
| <a href="#">Yacovitch et al. 2015</a>   | Tracer release     | 5                 | T&S compressors   |
| <a href="#">Mitchell et al. 2015</a>    | Tracer release     | 16                | Processing plants |
| <a href="#">Yacovitch et al. 2015</a>   | Tracer release     | 4                 | Processing plants |



**Table S3:** Description of the locations where ground-based empirical measurements used in this work were gathered.

| Oil/gas basin       | Facility category | Total # of measurements | Production well bins (Mcf/day)* |           |            |               |                 |          |
|---------------------|-------------------|-------------------------|---------------------------------|-----------|------------|---------------|-----------------|----------|
|                     |                   |                         | (0 - 29)                        | (29 - 88) | (88 - 346) | (346 - 1,205) | (1,205 - 3,908) | (>3,908) |
| Appalachian         | Well sites        | 739                     | 224                             | 74        | 18         | 74            | 152             | 197      |
| Barnett             | Well sites        | 228                     | 24                              | 50        | 93         | 71            | 19              | 3        |
|                     | T&S compressors   | 5                       |                                 |           |            |               |                 |          |
|                     | Processing plants | 4                       |                                 |           |            |               |                 |          |
| Denver-Julesburg    | Well sites        | 110                     | 39                              | 36        | 23         | 9             | 2               | 1        |
| Eagle Ford          | Well sites        | 4                       | -                               | 1         | 2          | -             | 1               | -        |
| Fayetteville        | Well sites        | 52                      | 3                               | 4         | 11         | 22            | 12              | -        |
| Permian             | Well sites        | 84                      | 19                              | 17        | 17         | 21            | 7               | 3        |
|                     | G&B compressors   | 3                       |                                 |           |            |               |                 |          |
| San Joaquin         | Well sites        | 66                      | 26                              | 30        | 10         | -             | -               | -        |
| Uinta               | Well sites        | 60                      | 14                              | 22        | 16         | 6             | 2               | -        |
| Greater Green River | Well sites        | 158                     | 9                               | 22        | 44         | 33            | 38              | 12       |
| All the U.S.**      | T&S compressors   | 45                      |                                 |           |            |               |                 |          |
|                     | G&B compressors   | 295                     |                                 |           |            |               |                 |          |
|                     | Processing plants | 16                      |                                 |           |            |               |                 |          |

\*Production well bins are determined by gas production cohorts corresponding to empirical measurement data gathered for production well sites (i.e., not applicable for T&S compressors, G&B compressors, and processing plants).

\*\*All the US refers to empirical measurements sampled from multiple oil/gas producing regions in the US without data on the specific oil/gas basis from which the measurements were gathered.

**Table S4:** Comparison of total oil/gas methane emissions from our facility-level inventory to the target regions from other aerial-based remote sensing studies.

| <i>Remote sensing study comparison: total regional emissions</i> |                                       |                               |                                                      |                                                   |                                                | <i>This work</i>                            |
|------------------------------------------------------------------|---------------------------------------|-------------------------------|------------------------------------------------------|---------------------------------------------------|------------------------------------------------|---------------------------------------------|
| <b>Study</b>                                                     | <b>Oil/gas basin(s)</b>               | <b>Total emissions (t/hr)</b> | <b>Estimated percentage of non-oil/gas emissions</b> | <b>Estimated percentage of pipeline emissions</b> | <b>Adjusted oil/gas basin emissions (t/hr)</b> | <b>Total oil/gas basin emissions (t/hr)</b> |
| MethaneAIR                                                       | Permian (RF-06)                       | 91 (62-115)                   | 0%                                                   | 30%                                               | 63 (43-80)                                     | 45 (38-55)                                  |
|                                                                  | Uinta (RF-08)                         | 15 (12-23)                    | 0%                                                   | 24%                                               | 11 (7.7-17)                                    | 11 (9-19)                                   |
| Cusworth et al. 2022                                             | SJ (S-2020)                           | 23 (20-26)                    | 35%                                                  | 45%                                               | 4.5 (3.8-5.2)                                  | 23 (19-31)                                  |
|                                                                  | SJ (F-2020)                           | 22 (17-27)                    | 0%                                                   | 41%                                               | 13 (10-16)                                     | 24 (20-32)                                  |
|                                                                  | SJ (F-2021)                           | 18 (16-20)                    | 7%                                                   | 23%                                               | 12 (11-14)                                     | 23 (19-31)                                  |
|                                                                  | Uinta (2020)                          | 34 (28-40)                    | 0%                                                   | 34%                                               | 21 (18-25)                                     | 14 (13-19)                                  |
|                                                                  | Permian (F-2019)                      | 415 (305-525)                 | 0%                                                   | 23%                                               | 320 (235-404)                                  | 226 (205-252)                               |
|                                                                  | Permian (S-2020)                      | 177 (118-236)                 | 0%                                                   | 20%                                               | 142 (94-189)                                   | 54 (45-68)                                  |
|                                                                  | Permian (S-2021)                      | 181 (141-221)                 | 0%                                                   | 19%                                               | 147 (113-180)                                  | 57 (49-72)                                  |
|                                                                  | Permian (F-2021)                      | 111 (83-139)                  | 0%                                                   | 9%                                                | 101 (66-136)                                   | 58 (50-72)                                  |
|                                                                  | Denver (S-2021)                       | 21 (17-25)                    | 44%                                                  | 7%                                                | 10 (8.3-12)                                    | 14 (11-24)                                  |
|                                                                  | Denver (F-2021)                       | 25 (18-32)                    | 21%                                                  | 28%                                               | 13 (9.4-16)                                    | 14 (11-24)                                  |
|                                                                  | App (2019)                            | 109 (70-148)                  | 67%                                                  | 3%                                                | 33 (21-44)                                     | 44 (33-79)                                  |
| Kunkel et al. 2023                                               | Permian                               | 112                           | NA                                                   |                                                   | NA                                             | NA                                          |
| Xia et al. 2024                                                  | Anadarko, Bakken, Eagle Ford, Permian | 162                           | NA                                                   |                                                   | NA                                             | NA                                          |
| Alvarez et al. 2018                                              | Appalachian                           | 18 (4-32)                     | NA                                                   | NA                                                | NA                                             | 17 (10-43)                                  |
|                                                                  | Bakken                                | 27 (14-40)                    |                                                      |                                                   |                                                | 36 (30-46)                                  |
|                                                                  | Barnett                               | 60 (49-71)                    |                                                      |                                                   |                                                | 83 (72-100)                                 |
|                                                                  | Weld                                  | 19 (5-33)                     |                                                      |                                                   |                                                | 14 (11-42)                                  |
|                                                                  | Fayetteville                          | 27 (19-35)                    |                                                      |                                                   |                                                | 9 (6-15)                                    |
|                                                                  | Haynesville                           | 73 (19-127)                   |                                                      |                                                   |                                                | 65 (53-91)                                  |
|                                                                  | San Juan                              | 57 (3-111)                    |                                                      |                                                   |                                                | 56 (47-66)                                  |
|                                                                  | West Arkoma                           | 26 (0-56)                     |                                                      |                                                   |                                                | 7 (5-10)                                    |

|                     |              |              |    |     |              |            |
|---------------------|--------------|--------------|----|-----|--------------|------------|
|                     | Uinta        | 55 (24-86)   |    |     |              | 11 (9-19)  |
| Chen et al.<br>2022 | NM - Permian | 194 (62-334) | NA | 19% | 157 (50-270) | 76 (69-98) |

**Table S5:** Description of remote sensing campaigns used for comparison to the facility-level model.

| <b>Study</b>            | <b>Flight UID</b>   | <b>Oil/gas basin</b> | <b>Survey year(s)</b> | <b>Regional estimate method</b> | <b>Measurement platform</b>                              |
|-------------------------|---------------------|----------------------|-----------------------|---------------------------------|----------------------------------------------------------|
| MethaneAIR              | RF-06               | Permian              | 2021                  | MethaneAIR<br>GIM inversions    | MethaneAIR                                               |
|                         | RF-08               | Uinta                | 2021                  |                                 |                                                          |
| Cusworth et al.<br>2022 | SJ (S-2020)         | San Joaquin          | Summer 2020           | TROPOMI<br>inversions           | GAO and<br>AVIRIS-NG                                     |
|                         | SJ (F-2020)         | San Joaquin          | Fall 2020             |                                 |                                                          |
|                         | SJ (F-2021)         | San Joaquin          | Fall 2021             |                                 |                                                          |
|                         | Uinta (S-2020)      | Uinta                | Summer 2020           |                                 |                                                          |
|                         | Permian (F-2019)    | Permian              | Fall 2019             |                                 |                                                          |
|                         | Permian (S-2020)    | Permian              | Summer 2020           |                                 |                                                          |
|                         | Permian (S-2021)    | Permian              | Summer 2021           |                                 |                                                          |
|                         | Permian (F-2021)    | Permian              | Fall 2021             |                                 |                                                          |
|                         | App (2019)          | Appalachian          | Spring 2019           |                                 |                                                          |
|                         | Denver (S-2021)     | Denver-Julesburg     | Summer 2021           |                                 |                                                          |
|                         | Denver (F-2021)     | Denver-Julesburg     | Fall 2021             |                                 |                                                          |
| Alvarez et al.<br>2018  | Appalachian         | Appalachian          | Spring 2015           | -                               | Various mass-<br>balance/tracer<br>aircraft<br>campaigns |
|                         | Bakken              | Bakken               | Spring 2014           |                                 |                                                          |
|                         | Barnett             | Barnett              | 2013                  |                                 |                                                          |
|                         | Weld                | Denver-Julesburg     | Spring 2012           |                                 |                                                          |
|                         | Fayetteville        | Fayetteville         | Fall 2015             |                                 |                                                          |
|                         | Haynesville-Bossier | Haynesville-Bossier  | Summer 2013           |                                 |                                                          |
|                         | San Juan            | San Juan             | Spring 2015           |                                 |                                                          |
|                         | West Arkoma         | West Arkoma          | Summer 2013           |                                 |                                                          |
|                         | Uinta               | Uinta                | Winter 2012           |                                 |                                                          |
| Kunkel et al.<br>2023   | Permian             | Permian              | -                     | -                               | Bridger GML                                              |

|                  |                      |                                       |           |                                                      |             |
|------------------|----------------------|---------------------------------------|-----------|------------------------------------------------------|-------------|
| Chen et al. 2022 | NM - Permian         | New Mexico - Permian                  | 2018-2020 | Accounting of partial detections from aerial surveys | Kairos      |
| Xia et al. 2024  | Four-basin aggregate | Anadarko, Bakken, Eagle Ford, Permian | -         | Combination of aerial measurements and simulations   | Bridger GML |

**Table S6:** Results of Kolmogorov-Smirnov tests for goodness of fit of our facility-level methane emissions distributions to empirical measurements for each facility category including high-emitter and low-emitter categories. Note that p-values above  $p=0.05$  indicate that we cannot reject the null hypothesis that the empirical and our estimated methane emission distributions are significantly different.

| <b>Top 5% of emitters</b>                       | <b>K-S test (p-value)</b> | <b>Bottom 95% of emitters</b>                   | <b>K-S test (p-value)</b> |
|-------------------------------------------------|---------------------------|-------------------------------------------------|---------------------------|
| <b>Production wells (0 - 27 boe/day)</b>        | 0.53                      | <b>Production wells (0 - 27 boe/day)</b>        | 0.24                      |
| <b>Production wells (27 - 84 boe/day)</b>       | 0.62                      | <b>Production wells (27 - 84 boe/day)</b>       | 0.57                      |
| <b>Production wells (84 - 330 boe/day)</b>      | 0.16                      | <b>Production wells (84 - 330 boe/day)</b>      | 0.73                      |
| <b>Production wells (330 - 1,200 boe/day)</b>   | 0.62                      | <b>Production wells (330 - 1,200 boe/day)</b>   | 0.77                      |
| <b>Production wells (1,200 - 3,864 boe/day)</b> | 0.97                      | <b>Production wells (1,200 - 3,864 boe/day)</b> | 0.53                      |
| <b>Production wells (&gt;3,864 boe/day)</b>     | 0.71                      | <b>Production wells (&gt;3,864 boe/day)</b>     | 0.89                      |
| <b>G&amp;B compressor stations</b>              | 0.07                      | <b>G&amp;B compressor stations</b>              | 0.37                      |
| <b>T&amp;S compressor stations</b>              | 0.93                      | <b>T&amp;S compressor stations</b>              | 0.25                      |
| <b>Processing plants</b>                        | 0.28                      | <b>Processing plants</b>                        | NA                        |

**Table S7:** Comparison of the aerially detected emissions and sub-aerial estimate emissions for seven sampling campaigns between Cusworth et al. (2022) and Sherwin et al. (2024). The sub-aerial detections for Cusworth et al. (2022) were calculated using the total TROPOMI estimated emissions subtracted by aerially detected emissions. Sub-aerial emissions for Sherwin et al. (2024) were calculated by Sherwin et al. (2024) using the OPGEE component-level model presented in Rutherford et al. (2021) for production well sites, and GHGI emission factors for midstream facilities. Percentage differences are calculated using the values from Sherwin et al. (2024) divided by the values of Cusworth et al. (2022). The seven campaigns were selected for comparison due to a predominance (i.e., >80%) of oil and gas sources in the regions, allowing for more direct comparisons.

| <i>Aerial campaign</i> | <i>Aerial (Cusworth et al 2022.) (t/hr)</i> | <i>Below aerial (Cusworth et al. 2022) (t/hr)</i> | <i>Aerial (Sherwin et al. 2024) (t/hr)</i> | <i>Below aerial (Sherwin et al. 2024) (t/hr)</i> | <i>% difference in aerial (Sherwin / Cusworth)</i> | <i>% difference in sub-aerial (Sherwin / Cusworth)</i> |
|------------------------|---------------------------------------------|---------------------------------------------------|--------------------------------------------|--------------------------------------------------|----------------------------------------------------|--------------------------------------------------------|
| <i>Permian 2019</i>    | 246                                         | 169                                               | 449                                        | 108                                              | +83%                                               | -36%                                                   |
| <i>Permian S-2020</i>  | 72                                          | 105                                               | 96                                         | 38                                               | +33%                                               | -64%                                                   |
| <i>Permian S-2021</i>  | 72                                          | 109                                               | 83                                         | 47                                               | +15%                                               | -57%                                                   |
| <i>Permian F-2021</i>  | 68                                          | 43                                                | 80                                         | 51                                               | +18%                                               | +19%                                                   |
| <i>Uinta 2020</i>      | 6.1                                         | 28                                                | 8.4                                        | 12                                               | +37%                                               | -58%                                                   |
| <i>SJ – F-2020</i>     | 5.6                                         | 16                                                | 6.4                                        | 2.6                                              | +14%                                               | -84%                                                   |
| <i>SJ – F-2021</i>     | 2.2                                         | 16                                                | 2.6                                        | 2.4                                              | +18%                                               | -85%                                                   |
|                        |                                             |                                                   |                                            | <b>Average</b>                                   | <b>+31%</b>                                        | <b>-52%</b>                                            |
